# Supplementary material for: Cadherin-dependent adhesion modulated 3D cell-assembly
Source: Royal Society of Chemistry journal article supplement (doi:10.1039/d2tb01006b), 2022-01-01
Supplement: d2tb01006b1.pdf [file d2tb01006b1.pdf]

## Supporting Information

### **Cadherin-dependent adhesion modulated 3D cell-assembly**

Wenjie Han,<sup>a</sup> Miao He,<sup>b</sup> Yunhan Zhang,<sup>b</sup> Junxiang Zhou,<sup>b</sup> Zhigang Li,<sup>b</sup> Xiaoyu Liu,<sup>b</sup> Xiaoyun Sun,<sup>a</sup> Xue Yin,<sup>b</sup> Dongbao Yao<sup>\*b</sup> and Haojun Liang<sup>\*ab</sup>

<sup>a</sup>Hefei National Research Center for Physical Sciences at the Microscale, iChEM (Collaborative Innovation Center of Chemistry for Energy Materials), University of Science and Technology of China, Hefei, Anhui 230026, China.

<sup>b</sup>School of Chemistry and Materials Science, Department of Polymer Science and Engineering, iChEM (Collaborative Innovation Center of Chemistry for Energy Materials), University of Science and Technology of China, Hefei, Anhui 230026, China.

\* Correspondence should be addressed to [dbyao@ustc.edu.cn](mailto:dbyao@ustc.edu.cn); [hjliang@ustc.edu.cn](mailto:hjliang@ustc.edu.cn)

## S1. Supplementary Figures

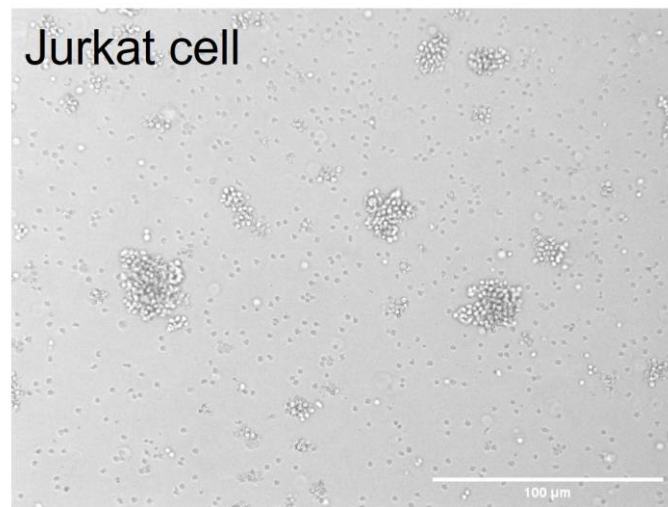

**Fig. S1.** Jurkat cells can aggregate automatically and assemble into cell clusters after natural growth, which were indistinguishable from the cell aggregates formed after expressing cadherin.

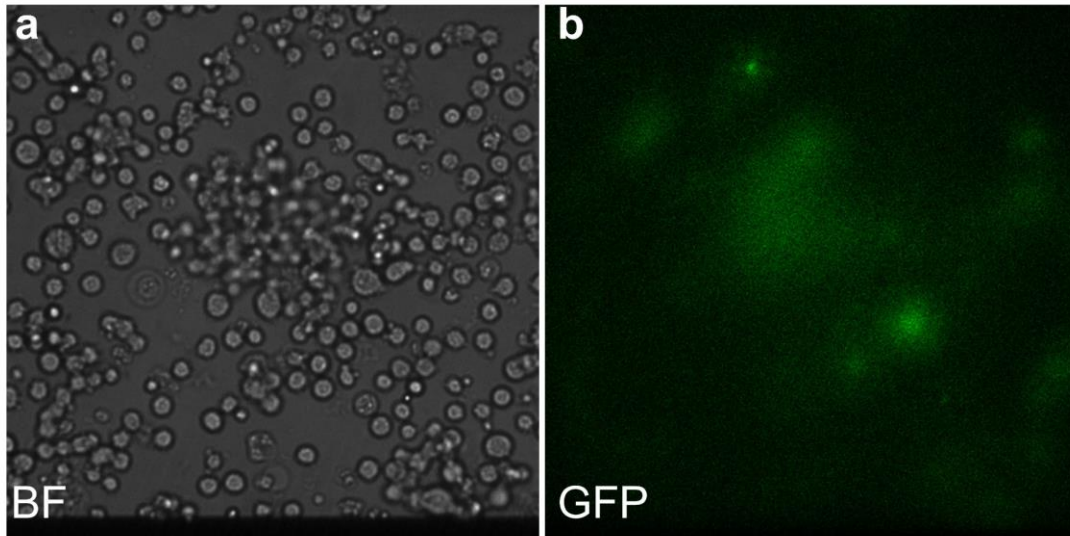

**Fig. S2.** Confocal microscopy images scanned from the Z-axis of assemblies formed by K562 cells after Ecad-EGFP expression. (a) Bright filed (BF). (b) Dark filed (GFP).

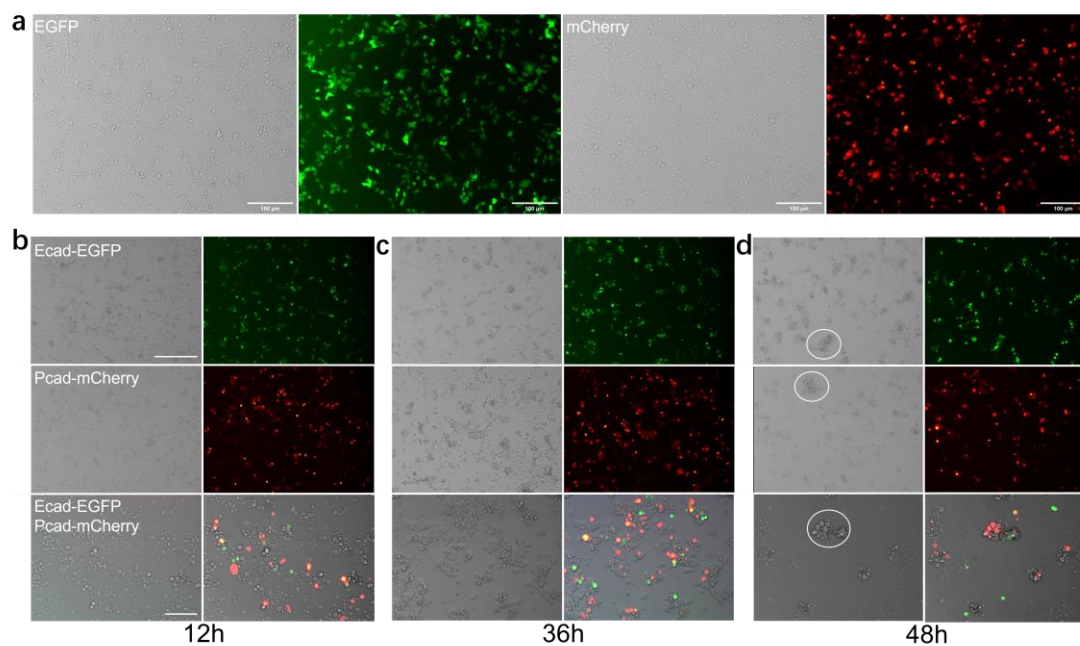

**Fig. S3.** Growth patterns and aggregated morphology of HEK293T cells expressing different proteins. (a) Fluorescence microscopy images of HEK293T transfected with the plasmid of EGFP and mCherry, respectively. The assembly results of HEK293T cells expressing Ecad-EGFP or/and Pcad-mCherry after cultured in 24-well plates for 12h (b), 36h (c), and 48h (d), respectively. Scale bar is 100 μm.

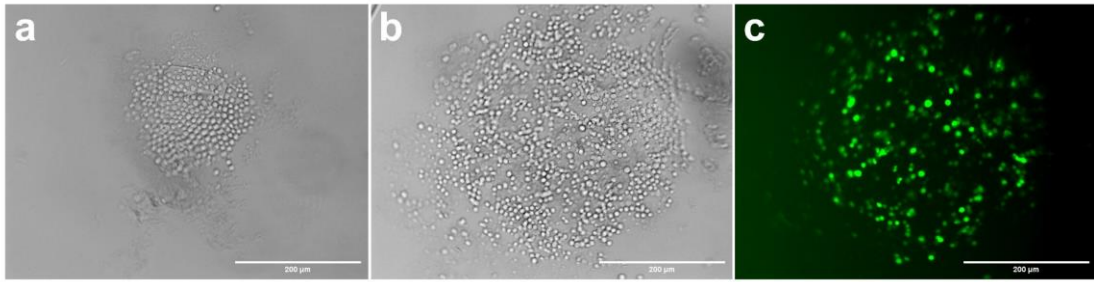

**Fig. S4.** K562 cells expressing Ecad-EGFP were cultured in a 96-well U-bottom culture plate. (a) Control. (b) Bright filed. (c) Dark filed. There were 40,000 cells per well. Scale bar is 200  $\mu\text{m}$ .

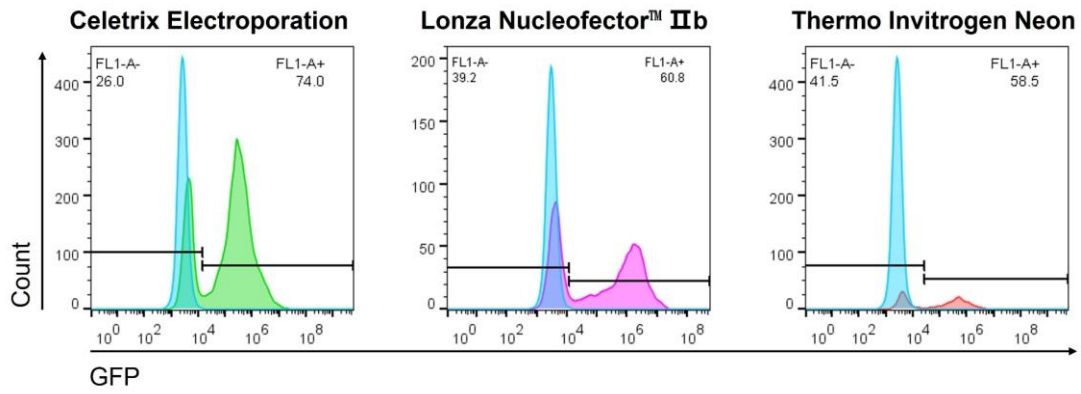

**Fig. S5.** Three electroporation instruments were used to test the efficiency of electroporation of HEK293T cells expressing Ecad-EGFP.

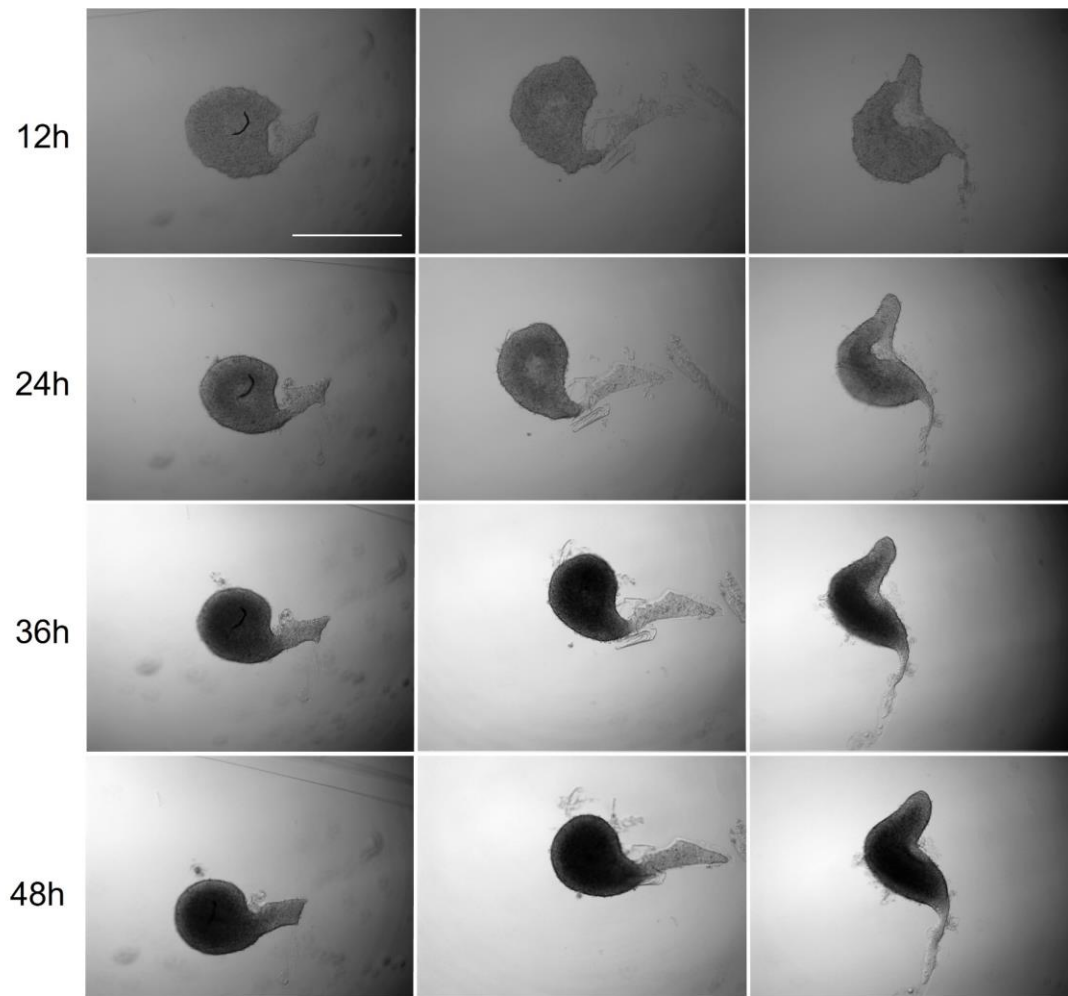

**Fig. S6.** Changes in the structure of normal HEK293T cells cultured in 96-well U-bottom plates over time. Scale bar is 200  $\mu\text{m}$ .

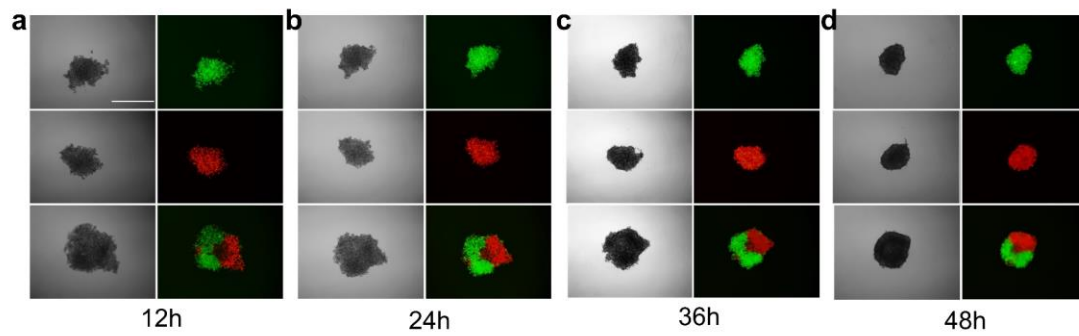

**Fig. S7.** Changes in the assembled structure of HEK293T cells electrotransduced with Ecad-EGFP and Ecad-mCherry for culturing alone or simultaneously in one well (without mixing, added from both sides) of a 96-well U-bottom culture plate when cultured for 12 h (a), 24 h (b), 36 h (c), and 48 h (d), respectively. Scale bar is 200  $\mu\text{m}$ .



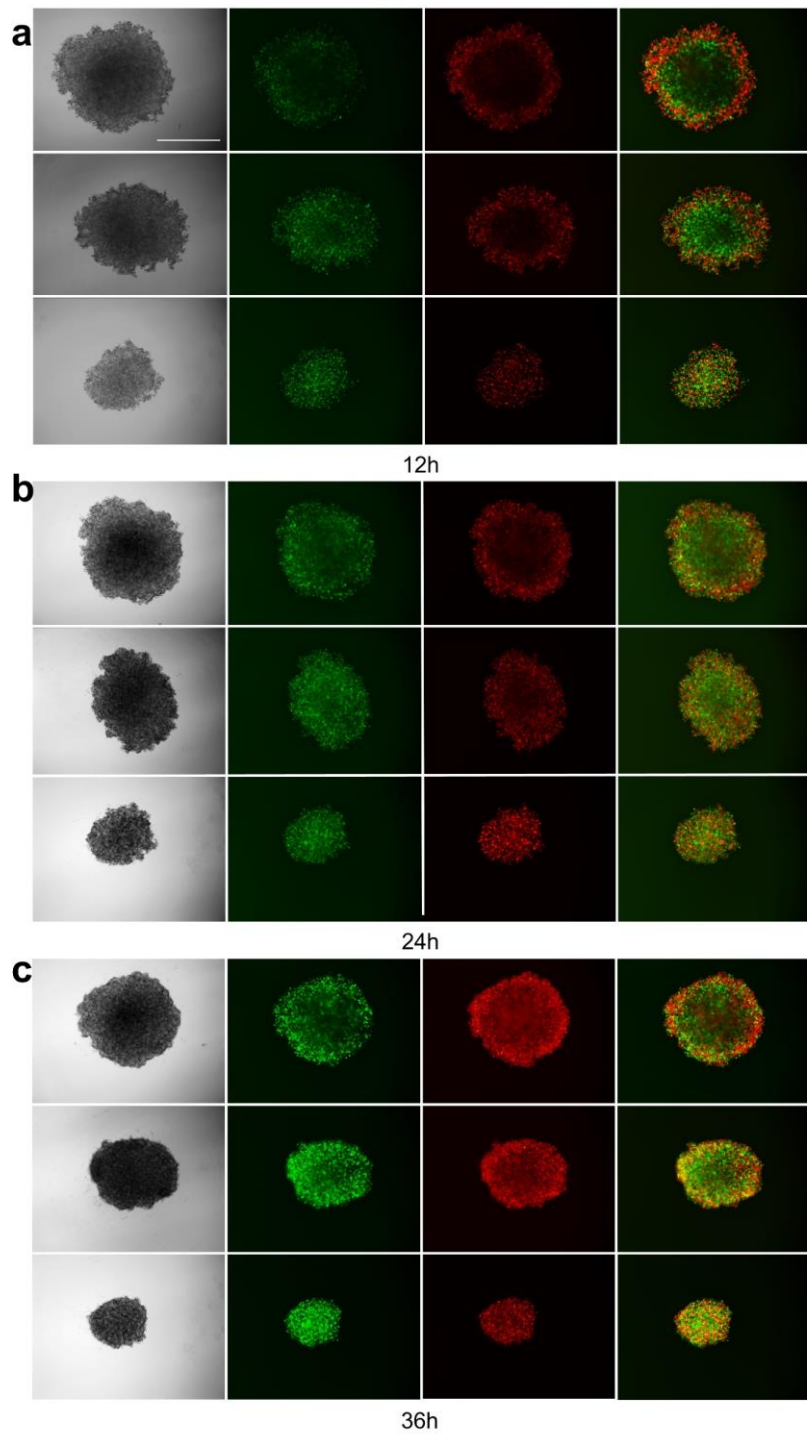

**Fig. S8.** HEK293T cells were electroporated with Ecad-EGFP and Ecad-mCherry plasmids, then mixed and transferred to 96-well U-bottom culture plates for culturing of 12 h (a), 24 h (b). and 36 h (c), respectively. Scale bar is 200  $\mu\text{m}$ .

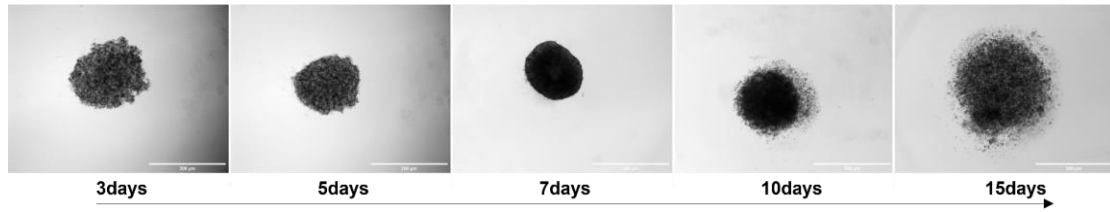

**Fig. S9.** HEK293T cells were transfected with cadherin plasmids and cultured for different days, the changes of 3D cell assemblies with the days.

Scale bar is 200  $\mu\text{m}$ .

## S2. Supplementary Tables

**Table S1.** Primer sequences (From 5' to 3').

|        |                                          |
|--------|------------------------------------------|
| Ecad-F | TAATACGACTCACTATAGGG                     |
| Ecad-R | CCGCGGTTAGTCGTCTCGCCGCCTCC               |
| Pcad-F | TTAGTGAACCGTCAGATCCGCAGGGTCGAGCTCGGATCCA |
| Pcad-R | GGATCCCGGGCCCCGCGGAATTCCCTAGTCGTCTCT     |

**Table S2.** plasmids sequences. Only the key gene sequences were shown.

The promoter was a combination of CMV promoter and CMV enhancer, the plasmid frame was pcDNA3.1.

(E-cadherin, P-cadherin, IRES, EGFP, mCherry)

|    |                                                                                    |
|----|------------------------------------------------------------------------------------|
| E  | atgggcccctggagccgcagcctctcggcgctgctgctgctgctgcaggtctcctctggctctgccaggagccggagccc   |
| c  | tgccaccctggctttgacgccgagagctacacgttcacggtgcccccggcgccacctggagagagggccgctcctgggca   |
| a  | gagtgaaatgaagattgcaccggctcgacaaaggacagcctatfttccctcgacaccgattcaaaagtgggcacagatggt  |
| d- | gtgattacagtcaaaaggcctctacggtttcataaccacagatccatttctggtctacgcctgggactccacctacagaaag |
| I  | tttccacaaagtcacgctgaatacagtggggcaccaccaccgccccgccccatcaggcctccgfttctggaatccaag     |
| R  | cagaattgtcacatttccaactcctctcctggcctcagaagacagaagagagactgggttattcctccatcagctgccca   |
| E  | gaaatgaaaaaggcccatttctaaaaacctggttcagatcaaatccaacaaagacaaagaaggcaaggtttctacagca    |
| S  | tactggccaaggagctgacacaccctgttggtgtcttattattgaaagagaaacaggatggctgaaggtgacagagcc     |
| -  | tctggatagagaacgcattgccacatacactctctctcacgctgtgtcatccaacgggaatgcagttgaggatccaatgga  |
| E  | gattttgatcacggttaaccgatcagaatgacaacaagcccgaattcaccaggaggtctttaaagggtctgtcatggaaggt |
| G  | gctctccaggaacctctgtgatggaggtcacagccacagacgcggacgatgatgtgaacacctacaatgccccatcgt     |
| F  | tacaccatcctcagccaagatcctgagctccctgacaaaaatgttcaccattaacaggaacacaggagtcacagtggtgt   |
| P  | caccactgggctggaccgagagagtttccctacgtataccctgggtggtcaagctgctgacctcaaggtgaggggtaagc   |
|    | acaacagcaacagctgtgatcacagtcactgacaccaacgataatcctccgatcttcaatcccaccacgtacaagggtcagg |
|    | tgctgagaacgaggtaaacgtcgaatcaccacactgaaagtgactgatgctgatgcccccaatacccagcgtgggagg     |
|    | ctgtataccatattgaatgatgatggtggacaatttctcaccacaaatccagtgaaacaacgatggcattttgaaaacag   |
|    | caaagggtggtgattttgaggccaagcagcagtcattctacacgtagcagtgacgaatgtggtacctttgaggtctctctca |
|    | ccacctccacagccaccgtcaccgtggatgtgctggatgtgaatgaagccccatcttctgctcctgaaaaagagagtgga   |
|    | agtgctcaggactttggcgtggccaggaaatcacatcctacactgccaggagccagacacatttatggaacagaaaat     |
|    | aacatatcggatttgagagacactgccaactggctggagattaatccggacactggtgccatttccactcgggctgagctg  |
|    | gacagggaggattttgagcacgtgaagaacagcacgtacacagccctaatcatagctacagacaatggttctccagttgcta |
|    | ctggaacagggacacttctgctgatcctgtctgatgtgaatgacaacgccccataccagaacctgaactatattctctgtg  |
|    | agaggaatccaaagcctcaggtcataaacatcattgatgcagaccttctcccaatacatctcccttcacagcagaactaaca |
|    | cacggggcgagtgccaactggaccattcagtaaacgaccaaccaagaatctatcattttgaagccaaagatggcctta     |
|    | gaggtgggtgactacaaaatcaatcctcaagctcatggataaccagaataaagaccaagtaccaccttagaggtcagcgtgt |
|    | gtgactgtgaagggggccggcgctctgtaggaaggcacagcctgtcgaagcaggattgcaaatcctgccattctgggg     |
|    | attcttgagggaattctgttctgtaattctgattctgctctctgctgttctcggaggagagcgggtgctaaagagccctta  |
|    | ctgccccagaggatgacaccgggacaacgtttactatgatgaagaaggaggcggagaagaggaccaggactttga        |

|                                                                                           |                                                                                                                                                                                                                                                                                                                                                                                                                                                                                                                                                                                                                                                                                                                                                                                                                                                                                                                                                                                                                                                                                                                                                                                                                                                                                                                                                                                                                                                                                                                                                                                                                                                                                                                                                                                                                                                                                                                                                                                                                                                        |
|-------------------------------------------------------------------------------------------|--------------------------------------------------------------------------------------------------------------------------------------------------------------------------------------------------------------------------------------------------------------------------------------------------------------------------------------------------------------------------------------------------------------------------------------------------------------------------------------------------------------------------------------------------------------------------------------------------------------------------------------------------------------------------------------------------------------------------------------------------------------------------------------------------------------------------------------------------------------------------------------------------------------------------------------------------------------------------------------------------------------------------------------------------------------------------------------------------------------------------------------------------------------------------------------------------------------------------------------------------------------------------------------------------------------------------------------------------------------------------------------------------------------------------------------------------------------------------------------------------------------------------------------------------------------------------------------------------------------------------------------------------------------------------------------------------------------------------------------------------------------------------------------------------------------------------------------------------------------------------------------------------------------------------------------------------------------------------------------------------------------------------------------------------------|
|                                                                                           | <p>cttgagccagctgcacaggggctggacgctcggcctgaagtgactcgtaacgacgttgaccaaccctcatgagtgtccc<br/> ccggtatcttccccgcctgccaatcccgatgaaattggaattttattgatgaaaatctgaaagcggctgatactgacccccac<br/> agccccgccttatgattctctgctcgtgtttgactatgaaggaagcgggtccgaagctgctagtctgagctccctgaactcctca<br/> gagtcagacaaagaccaggactatgactactgaaacgaatggggcaatcgttcaagaagctggctgacatgtacggagg<br/> cggcgaggacgactaaccgcgggcccgggatccgccccctctccctccccccccctaacgttactggccgaagccgcttg<br/> gaataaggccgggtgtgcgtttgtctatatgttatttccaccatattgcccgtctttggcaatgtgagggcccggaaacctggcc<br/> ctgtctcttgacgagcattctaggggtcttccccctcgcgcaaaaggaatgcaaggctgttgaatgtcgtgaaggaagcag<br/> ttcctctggaagctcttgaagacaaacaacgtctgtagcgacccttgcaggcagcggaaacccccacctggcgacaggt<br/> gcctctgcggccaaaagccacgtgtataagatacacctgcaaagggcgacacacccagtgccacgttgtgagtggatag<br/> ttgtggaagagtcaaaggtctcctcaagcgtattcaacaaggggctgaaggatgccagaaggtacccattgtatggg<br/> atctgatctggggcctcgggtgcacatgctttacatgtgtttagtcgaggtfaaaaaaacgtctaggccccccgaaccacgggg<br/> acgtggtttccttgaaaaacagatgataatggccacaaccatgggtgagcaagggcgaggagctgttaccgggggtgg<br/> tgcccatctgtcagctggacggcgacgtaaacggccacaagttcagcgtgtccggcgagggcgagggcgatgccac<br/> ctacggcaagctgacctgaagttcatctgcaccaccggcaagctgcccgtgccctggcccacctctgaccacctgac<br/> ctacggcgtgcagtgttcagccgtaccaccacatgaagcagcagcactctcaagtccgccatgccgaaggcta<br/> cgtccaggagcgcacatcttctcaaggacgacggcaactacaagaccgcgccgaggtgaagttcagggcgacacc<br/> ctggtgaaccgcatcagctgaagggcctcactcaaggaggacggcaacatcctggggcacaagctggagtacaact<br/> acaacagccacaacgtctatatcatggccgacaagcagaagaacggcatcaaggtgaactcaagatccgccacaacac<br/> gaggacggcagcgtgcagctcggcaccactaccagcagaacacccccatcggcgacggccccgtgctgctgcccgac<br/> aaccactacctgagcaccagtcgccctgagcaaaagacccaacgagaagcgcgatcacatggtcctgctggagttcgt<br/> gaccgcccggggatcactctcgcatggacgagctgtacaagtaa</p>                                                                                                                                                                                                                                 |
| <p>E<br/>c<br/>a<br/>d-<br/>I<br/>R<br/>E<br/>S<br/>-<br/>m<br/>C<br/>h<br/>er<br/>ry</p> | <p>atgggccccttgagccgcagcctctcggcgtgctgctgctgctgcaggtctcctctggctctgccaggagccggagccc<br/> tgccacctggccttgacgccgagagctacacgttccaggtgccccggcgccacctggagagaggccgctcctgggca<br/> gagtgaaatttgaagattgcaccggctgcacaaaggacagcctattttccctcgcacaccgatcaaaagtgggcacagatggt<br/> gtgattacagtcaaaaggcctctacggtttcataaccacagatccatttctggctacgcctgggactccacctacagaaag<br/> tttccaccaaaagtcacgctgaatacagtggggaccaccaccgccccgccccatcaggcctccgtttctggaatccaag<br/> cagaattgtcacatttccaaactcctcctggcctcagaagacagaagagagactgggttattcctccatcagctgcca<br/> gaaaatgaaaaaggccatttctaaaaacctggtcagatcaaatcaacaaagacaaagaaggcaaggtttctacagca<br/> tactggccaaggagctgacacccccctgttgggtctttattttaaagagaaacaggatggctgaaggtgacagagcc<br/> tctggatagagaacgattgccacatacactcttctctcagcgtgtgtcatccaacgggaatgcagttgaggatccaatgga<br/> gattttgatcacggtaaccgatcagaatgacaacaagcccgaattcaccagggaggtctttaaagggtctgtcatggaaggt<br/> gctcttcaggaacctctgtgatggaggtcacagccacagacggcagatgatgtgaacacctacaatccgccatcgt<br/> tacaccatcctcagccaagatcctgagctcctgacaaaaatattgaccattaacaggaacacaggagtcacatggtgtg<br/> caccactgggctggaccgagagatttccctacgtataccctgggtggttcaagctgctgacctcaaggtgaggggttaagc<br/> acaacagcaacagctgtgatcacagtcactgacaccaacgataatcctccgatcttcaatcccaccacgtacaaggtcagg<br/> tgctgagaacgaggtaacgtcgtaatcaccacactgaaagtactgatgctgatgcccccaatccccagcgtgggagg<br/> ctgtataccatattgaatgatgatggggacaattgtcgtcaccacaaatccagtgaacaacgatggcattttgaaaacag<br/> caaaaggccttgattttgaggccaagcagcagtacattctacacgtagcagtgacgaatgtggtacctttgaggtctctca<br/> ccacctccacagccaccgtcaccgtggatgtgctggatgtgaatgaagccccatctttgtccctcctgaaaagagagtgg<br/> agtgtccgaggactttggcgtgggcccaggaatcacatcctacactgccaggagccagacacatttatggaacagaaaat<br/> aacatatacggattggagagacactgccaactggctggagattaatccggacactgggtgccatttccactcgggctgagctg<br/> gacagggaggattttgagcacgtgaagaacgacgtacacagccctaatcatagctacagacaatggttctccagttgcta<br/> ctggaacagggacacttctgctgatcctgtctgatgtgaatgacaacgccccataccagaacctgaactatattcttctgtg<br/> agaggaatccaaagcctcaggtcataaacatcattgatgcagacctctcccaatacatctcccttcacagcagaactaaca</p> |

|                                                                                   |                                                                                                                                                                                                                                                                                                                                                                                                                                                                                                                                                                                                                                                                                                                                                                                                                                                                                                                                                                                                                                                                                                                                                                                                                                                                                                                                                                                                                                                                                                                                                                                                                                                                                                                                                                                                                                                                                                                                                                                                                                                                                                                                                                                                                              |
|-----------------------------------------------------------------------------------|------------------------------------------------------------------------------------------------------------------------------------------------------------------------------------------------------------------------------------------------------------------------------------------------------------------------------------------------------------------------------------------------------------------------------------------------------------------------------------------------------------------------------------------------------------------------------------------------------------------------------------------------------------------------------------------------------------------------------------------------------------------------------------------------------------------------------------------------------------------------------------------------------------------------------------------------------------------------------------------------------------------------------------------------------------------------------------------------------------------------------------------------------------------------------------------------------------------------------------------------------------------------------------------------------------------------------------------------------------------------------------------------------------------------------------------------------------------------------------------------------------------------------------------------------------------------------------------------------------------------------------------------------------------------------------------------------------------------------------------------------------------------------------------------------------------------------------------------------------------------------------------------------------------------------------------------------------------------------------------------------------------------------------------------------------------------------------------------------------------------------------------------------------------------------------------------------------------------------|
|                                                                                   | <p>cacggggcgagtgccaactggaccattcagfacaacgaccaaccaagaatctatcatttgaagcceaagatggcctta<br/> gaggtgggtgactacaaaatcaatctcaagctcatggataaccagaataaagaccaagtgaccaccttagaggtcagcgtgt<br/> gtgactgtgaaggggcccggcgtctgtaggaaggcacagcctgtcgaagcaggattgcaaattcctgccattctgggg<br/> attctggaggaattctgtcttctgtaattctgattctgctgctctgtcttctcggaggagagcgggtggcaaaagaccctta<br/> ctgccccagaggatgacaccgggacaacgttattactatgatgaagaaggagggcggagaagaggaccaggacttga<br/> cttgagccagctgcacagggcctggacgctcggcctgaagtactcgtaacgacgtgcaccaacctcatgagtgtccc<br/> ccggtatctccccgcctgccaatccgatgaaattggaaatcttattgatgaaaatctgaaagcggctgatactgacccac<br/> agccccgccttatgattctctgctcgtgttactatgaaggaagcgggtccgaagctgtagtctgagctccctgaactcctca<br/> gagtcagacaaaagaccaggactatgactactgaacgaatggggcaatcgttcaagaagctggctgacatgtacggagg<br/> cggcgaggacgactaaccggggcccgggatccgccccctcccccccccaacgttactggccgaagccgcttg<br/> gaataaggccggtgtcgttctatattttccaccatattgccgtctttggcaatgtgaggcccgaaacctggcc<br/> ctgtctctgacgagcattcctaggggtcttccccctcgcgcaaaaggaatgcaaggtctgtgaatgtcgtgaaggagcag<br/> ttctctggaagctctgaagacaaaacgctctgtagcgacccttgcaggcagcggaaacccccactggcgacaggt<br/> gcctctgcggcctcaaaagccacgtgtataagatacacctgcaaaagcggcacaacccccagtgccacgttgtgagtggatag<br/> ttgtgaaaagagtcaaatggctctcctcaagcgtattcaacaaggggctgaaggatgccagaaggtacccattgtatggg<br/> atctgatctggggcctcgggtgcacatgctttacatgtgttagtcgagggttaaaaaaacgcttagccccccgaaccacgggg<br/> acgtggtttcttgaaaaacacgatgataatggccacaacctggtgagcaagggcgaggagataacatggccatca<br/> tcaaggagtcatgcgctcaaggtgcacatggagggtcctgtaacggccacgagttcagatcagggcgaggggcga<br/> gggccccttacgagggcacccagaccgcaagctgaaggtgaccaaggtggccccctgccctgcctgggacat<br/> cctgtccccctcagttcatgtacggctcaaggcctacgtgaagcaccggcagatccccgactactgaagctgtcctcc<br/> ccgagggtctcaagtgggagcgcgtgatgaactcaggacggcggcgtggtgaccgtgaccaggactcctccctcca<br/> ggagggcaggtcactacaaggtgaagctgcgcggaccaactccccctccgacggccccgtaatgcagaagaagacc<br/> atgggctgggagggcctcctccgagcggatgaccccgaggacggcgcctgaagggcgagatcaagcagaggctgaag<br/> ctgaaggacggcggcactacgacgtgaggtcaagaccactacaaggccaagaagcccgtgagctgccccggcgc<br/> tacaacgtcaacatcaagttggacatcacctcccacaacgaggactacaccatcgtggaacagtacgaacgcgccgagg<br/> ccgccaactccaccggcgcatggacgagctgtacaagtaa</p> |
| <p>P<br/>c<br/>a<br/>d-<br/>I<br/>R<br/>E<br/>S<br/>-<br/>E<br/>G<br/>F<br/>P</p> | <p>atggggctccccctggtgacacctcgcgtctcctcctcctccaggttctgctggctgcagtcgcggcctccgagccgtgccg<br/> ggcggctctcagggaggctgaagtgaccttgaggcgggaggcgcggagcaggagcccggccaggcgtggggaaa<br/> gtattcatgggtgcccctgggcaagagccagctctgttagcactgataatgatgacttactgtcggaatggcgagacagt<br/> ccaggaagaaggtcactgaaggaaaggaatccattgaagatctccatccaacgtatcttacgaagacacaagagaga<br/> ttgggtggtgtccaatatctgtcctgaaaatggcaaggtccctccccagagactgaatcagctcaagtctaataaaga<br/> tagagacccaagattttctacagcatcacggggccggggcagacagccccctgagggtgtctcgtgtagagaagg<br/> agacaggctggtgtgtgtaataagccactggaccgggaggagattgccaagtatgagctcttggccacgctgtgtcaga<br/> gaatggtgctcagtgaggaccatgaacatctccatcatcgtgaccgaccagaatgaccacaagccaagtattacca<br/> ggacacctccgagggaggtcttagaggagtctaccaggtactctgtgatgaggtgacagccacggatgaggatga<br/> tgccatctacactacaatgggggtgtgtactccatcatagccaagaacaaaggaccacacgacctcatgttacca<br/> ttaccgggacacaggcaccatcagcgtcatctcagtgccctggaccgggaaaaagtcctgagtacacactgacctcc<br/> aggccacagacatggatggggacggctccaccaccggcagtggcagtagtgagatccttgatgccaatgacaatgct<br/> ccccgtttgacccccagaagtacgaggccatgtgcctgagaatgagtgggccatgaggtgacagggctgacggtcac<br/> tgatctggagccccccaactcaccagcgtggcgtgccacctacattatctggggggtgacgacggggaccatttaccatc<br/> accaccacctgagagcaaccaggcatcctgacaaccaggaagggttggatttggaggcaaaaaccgacacacct<br/> gtacgttgaagtgaccaacgagggcccccttctgtcgaagctcccaacctccacagccaccatagtggtccacgtggaggat<br/> gtgaatgaggcacctgtgttctccacctccaaagtcgtgaggtccaggaggcatccccactggggagcctgtgtgtg<br/> tctacactgcagaagacctgacaaggagaatcaaaagatcagctaccgcatcctgagagaccagcagggtggctagcc</p>                                                                                                                                                                                                                                                                                                                                                                                                                                                                                                                                                                                                                                                               |

|                                                                                           |                                                                                                                                                                                                                                                                                                                                                                                                                                                                                                                                                                                                                                                                                                                                                                                                                                                                                                                                                                                                                                                                                                                                                                                                                                                                                                                                                                                                                                                                                                                                                                                                                                                                                                                                                                                                                                                                                                                                                                                                                                                                                                                                                                                                                                                                                                                                                                                                                                                                                                              |
|-------------------------------------------------------------------------------------------|--------------------------------------------------------------------------------------------------------------------------------------------------------------------------------------------------------------------------------------------------------------------------------------------------------------------------------------------------------------------------------------------------------------------------------------------------------------------------------------------------------------------------------------------------------------------------------------------------------------------------------------------------------------------------------------------------------------------------------------------------------------------------------------------------------------------------------------------------------------------------------------------------------------------------------------------------------------------------------------------------------------------------------------------------------------------------------------------------------------------------------------------------------------------------------------------------------------------------------------------------------------------------------------------------------------------------------------------------------------------------------------------------------------------------------------------------------------------------------------------------------------------------------------------------------------------------------------------------------------------------------------------------------------------------------------------------------------------------------------------------------------------------------------------------------------------------------------------------------------------------------------------------------------------------------------------------------------------------------------------------------------------------------------------------------------------------------------------------------------------------------------------------------------------------------------------------------------------------------------------------------------------------------------------------------------------------------------------------------------------------------------------------------------------------------------------------------------------------------------------------------------|
|                                                                                           | <p>atggaccagacagtgggcaggtcacagctgtgggcaccctcgaccgtgaggatgagcagttgtgaggaacaacatcta<br/> tgaagtcattggtctggccatggacaatggaagccctcccaccactggcacgggaacctctgtaaacactgattgatgca<br/> atgaccatggcccagtcctgagccccgtagatcaccatctgcaacaaagccctgtgcccagggtgtaacatcacgg<br/> acaaggacctgtctccccacacctccccctccagggccagctcacagatgactcagacatctactggacggcagaggtca<br/> acgaggaaaggtgacacagtggctctgcccgaagaagtctgaagcaggatacatatgacgtgcacctctctgtctgac<br/> catggcaacaaagagcagctgacgggtatcaggccactgtgtgactgcatggccatgcaaacctgccctggacc<br/> ctggaaagggaggttcatcctcctgtgctggggctgtctggctctgctgttctcctgctggtgctgtttgttggtgaga<br/> aagaagcggaaatcaaggagccccctactcccagaagatgacaccctgacaacgtcttactatggcgaagaggg<br/> gggtggcgaagaggaccaggactatgacatcaccagctccaccgaggtctggagggcaggccggaggtggttctccgc<br/> aatgacgtggccaacctatcccacacctatgacctctcggccagccaaccagatgaaatggcaactttataa<br/> ttgagaacctgaaggcggtaacacagaccacagccccgcctacgacacctcttggtgtcactatgagggcagc<br/> ggctccgacggcgtcctgagctcctcactcctccgctccgaccaagaccaagattacgattatctgaacgagtg<br/> ggcagcccctcaagaagctggcagacatgfacgggtggcggggagggacgactagggaattccggggcccggtatccg<br/> ccccctcccccccccaacgttactggccgaagccgttgaataaggccggtgtgctttgtctatattttcc<br/> accatattgccgtctttggcaatgtgagggcccggaaacctggccctgtcttctgacgagcattcctagggtctttccctc<br/> tcgcaaaaggaatgcaaggctgtgaaatgctgtaagggaagcagttcctctggaagctcttgaagacaacaacgtctgta<br/> gagacctttgagggcagcggaaacccccacctggcgacaggtgctctgcccgaacaaagccacgtgtataagatacacc<br/> tgcaaaagcggcacaacccccagtgccacgttgtgagttggatagttgtgaaagagtcacaatggctctcctcaagcgtatc<br/> aacaaggggctgaaggatgccagaaggtaccctattgatgggatctgatctggggcctcgggtgcacatgctttacatgtg<br/> tttagtcgaggttaaaaaacgtctaggccccccgaaccacggggacgtggtttccttgaaaaaacagatgataatagc<br/> cacaaccatggtgagcaaggcggagagctgtaccggggtgtgcccactctggtcagctggacggcagcgtaaac<br/> ggccacaaggtcagcgtgtccggcagggcggaggggatgccactacggcaagctgacctgaagttcactcgcacca<br/> ccggcaagctgccctgcccaccctctgaccacctgacctacggcgtcagctctcagccgtacccccgac<br/> cacatgaagcagcagcactctcaagtcgccatgccgaaggctactccaggagcgcacctctctcaaggacgac<br/> ggcaactacaagaccgcgccgaggtgaagttcagggcgacacctggtgaaccgcacgcagctgaagggcactcact<br/> taaggaggacggcaacatcctggggcacaagctggagtaactacaacagccacaacgtctatataatggccgacaag<br/> cagaagaacggatcaaggtgaactcaagatccgccacaacatcaggacggcagcgtcagctcggcaccactacc<br/> agcagaacacccccatcggcgacggccccgtgctgctgcccgacaaccactacctgagcaccagctccgccctgagcaa<br/> agacccaacgagaagcgcgatcacatggtcctgctggagttcgtgaccgccggggatcactctcggeatggacgag<br/> ctgtacaagtaa</p> |
| <p>P<br/>c<br/>a<br/>d-<br/>I<br/>R<br/>E<br/>S<br/>-<br/>m<br/>C<br/>h<br/>er<br/>ry</p> | <p>atggggctcctcgtggacctctcgcgtctcctccttccaggttctgctggctcagctgcgcggcctccgagccgtgccg<br/> ggcggctctcagggaggtgaagtgacctggagggcgggagggcggagcaggagcccggccagggcgtggggaaa<br/> gtattcatgggctgccctgggcaagagccagctctgttagcactgataatgatgactcactgtcgggaatggcgagacagt<br/> ccaggaagaaggtcactgaaggaaaggaatccattgaagatctccatccaacgtatcttacgaagacacaagagaga<br/> ttgggtggtgctccaatatctgcccgaagaatggcaagggtccctccccagagactgaatcagctcaagtctaataaga<br/> tagagacaccaagattttctacagcatcacggggccggggcagacagccccctgaggggtgtctcgtgtagagaagg<br/> agacaggctggtgtgtgaataagccactggaccgggagagattccaagatgagctcttggccacgctgtgtcaga<br/> gaatggtgcctcagtgaggaccatgaacatctcatcctgaccgaccagaatgaccacaagccaagttfaccaca<br/> ggacacctccgagggaggtgtcttagagggagtcctaccaggtactctgtgatgcaggtgacagccacggatgaggatga<br/> tgccatctacactacaatggggtggtgcttactccatccatagccaagaacaaaggaccacacgacctcatgttccaca<br/> ttcaccggagcacaggcaccatcagcgtcatctccagtggcctggaccgggaaaaagtcctgagtacacactgacctcc<br/> aggccacagacatggtggggacggctccaccaccagggcagtgagcagtagtgagatccttgatccaatgacaatgct<br/> ccatgtttgacccccagaagfacaggcccatgtgctgagaatgagtgggccatgaggtgacagggctgacgggtcac<br/> tgatctggaccccccaactcaccagcgtggcgtgccacctacttatcatggggcggtagcagcggggaccattttaccatc</p>                                                                                                                                                                                                                                                                                                                                                                                                                                                                                                                                                                                                                                                                                                                                                                                                                                                                                                                                                                                                                                                                                                                                                                                                                                                                                      |

accaccaccctgagagcaaccaggcatcctgacaaccaggaagggttggatttgaggccaaaaccagcacacct  
gtacgttgaagtaccaacgagggccctttgtgctgaagctccaacctccacagccaccatagtggccaagtggaggat  
gtgaatgaggcacctgtgttgcaccctccaaagctgtgaggtccaggaggcatccccactggggagcctgtgtgtg  
tctacactgcagaagacctgacaaggagaatcaaaagatcagctaccgcatcctgagagaccagcagggtgtagcc  
atggaccagacagtgggcaggtcacagctgtgggcaccctcaccgtgaggatgagcagttgtgaggaacaacatca  
tgaagtcattggtcttgccatggacaatggaagccctcccaccactggcacgggaacccttctgtaacactgattgatgca  
atgaccatggcccagtcctgagccccgtcagatcaccatctgcaaccaaagccctgtgcccagggtctgaacatcagg  
acaaggacctgtctcccacacctccccttccaggcccagctcacagatgactcagacatctactggacggcagaggta  
acgagggaaggtagacagtggcttctgcctgaagaagtctgaagcaggatataatgacgtgcaccttctctgtctgac  
catggcaacaagagcagctgacggtgatcaggccactgtgtgactgcatggccatgtcgaacctgccctggacc  
ctggaaggagggttcatcctcctgtgtctggggctgtctggctctgtcttctctgtgtgtctgttctgtgtgaga  
aagaagcggagatcaaggagccccctactcccagaagatgacaccctgacaaccttctactatggcgaaggagg  
gggtggcgaagaggaccaggactatgacatcaccagctccaccagggtctggaggccaggccggagggtgtctccgc  
aatgacgtggcaccacatcatcccacacctatgacctctcggccagccaaccagatgaaatcggaacttataa  
ttgaaacctgaaggcggtaacacagaccccacagccccgcctacgacaccttgggtgtcactatgagggcagc  
ggctccgacggcgtcctgagctccctcactcctccgcctccgaccaagaccaagattacgattatgaacgagtg  
ggcagccctcaagaagctggcagacatgtacggtggcggggaggacgactagggaattccggggccgggatccg  
ccccctcctcccccccccaacgtfactggccgaagccgcttgaataaggccggtgtgctgttctctatatttcc  
accatattgccgtctttggcaatgtgagggcccgaaacctggccctgtcttctgacgagcattcctagggtctttcccc  
tcgcaaaaggaatgcaaggctgtgtaagtgtgtaaggaagcagttcctctggaagcttctgaaagcaaacgtctgta  
gagaccttgcaggcagcggaaacccccacctggcgacaggtgcctctgcccgaacaaagccacgtgtataagatacac  
tgcaaaaggcggcacaacccagtgccacgttgtgagttggatagttgtgaaagagtcfaatggctcctcaagcgtattc  
aacaaggggctgaaggatgccagaaggfacccattgtatgggatctgatctggggcctcgggtgcacatgctttacatgtg  
tttagtcgaggttaaaaaaacgtctaggccccccgaaccaggggacgtggtttcttfgaaaaaacagatgataatggc  
cacaaccatggtgagcaaggcagaggataaacatggccatcatcaaggagttcatgccttcaagggtcacatggagg  
gctcctgaaacggccacgagttcagatcagggcgagggcgagggcccccctacagggcaccagaccgccaag  
ctgaaggtagcaagggtggccccctgccctcgcctgggacatcctgtcccctcagttcatgtacggctcaagcctacg  
tgaagcaccgccgacatcccactactgaagctgtcctcccaggggcttcaagtgaggcgcgtgatgaactcg  
aggacggcggcgtggtgaccgtgaccaggactcctcctccaggacggcagttcatctacaaggtgaagctgcgagg  
cacaactccccctccgacggccccgtaatgcagaagaagaccatgggctgggaggcctcctccgagcggatgacccc  
gaggacggcgcctgaaggcagatcaagcagaggctgaagctgaaggacggcggccactacgacgtgaggtcaa  
gaccactacaaggccaagaagcccgtgacgtccccggcctacaacgtcaacatcaagttgacatcactcccaca  
acgaggactacaccatcgtggaacagtacgaacgcgccaggggccaccctcaccggcggcatggacgagctgtaca  
agtaa
